# Supplementary material
Source: Springer Nature journal article supplement (https://www.springermedizin.de/resource/supplementary/12936_2008_693_MOESM12_ESM.pdf/9548014)

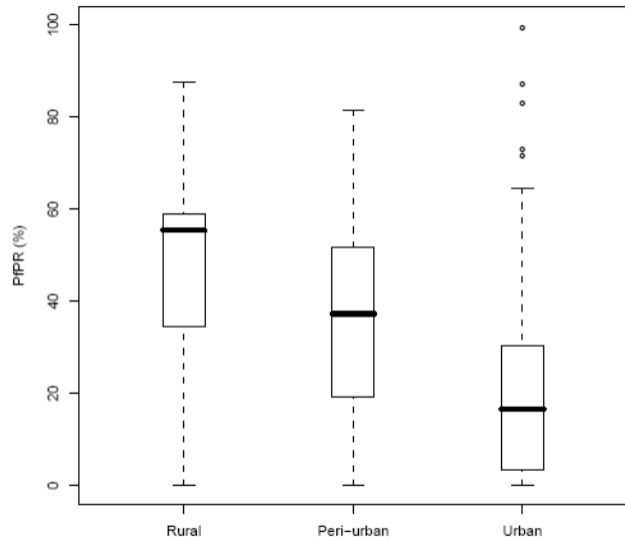

(a)

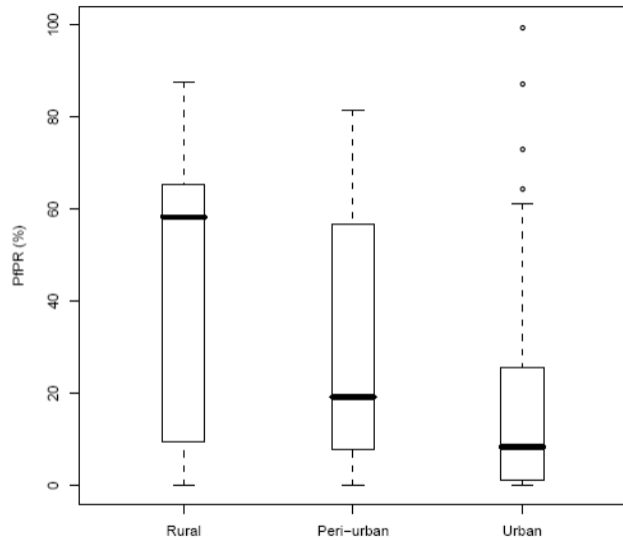

(b)

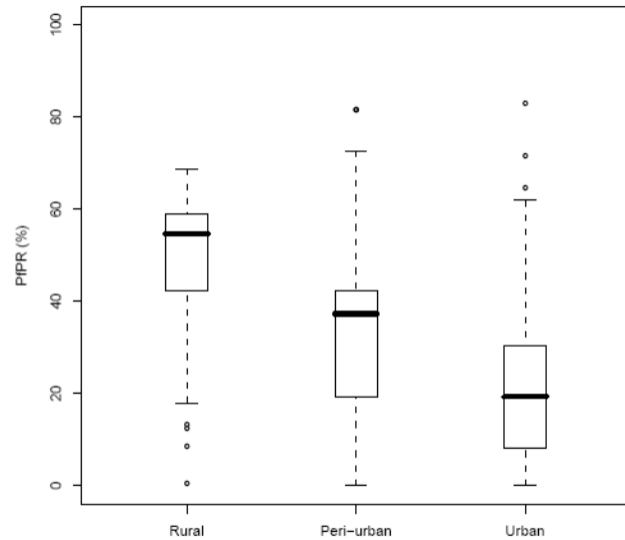

(c)

Supplement: MOESM12 [file 9548014]
